# Supplementary material for: Polypyrrole-coated α-MoO3 nanobelts with good electrochemical performance as anode materials for aqueous supercapacitors
Source: Royal Society of Chemistry journal article supplement (doi:10.1039/c3ta12902k), 2013-01-01
Supplement: c3ta12902k.pdf [file c3ta12902k.pdf]

# Polypyrrole-coated $\alpha$ -MoO<sub>3</sub> nanobelts with good electrochemical performance as anode material for aqueous supercapacitor

Yu Liu,<sup>a,b</sup> Baihe Zhang,<sup>a,b</sup> Yaqiong Yang,<sup>a</sup> Zheng Chang,<sup>a</sup> Zubiao Wen<sup>\*,b</sup> and Yuping Wu<sup>\*a</sup>

5  
Electronic supplement information (ESI):

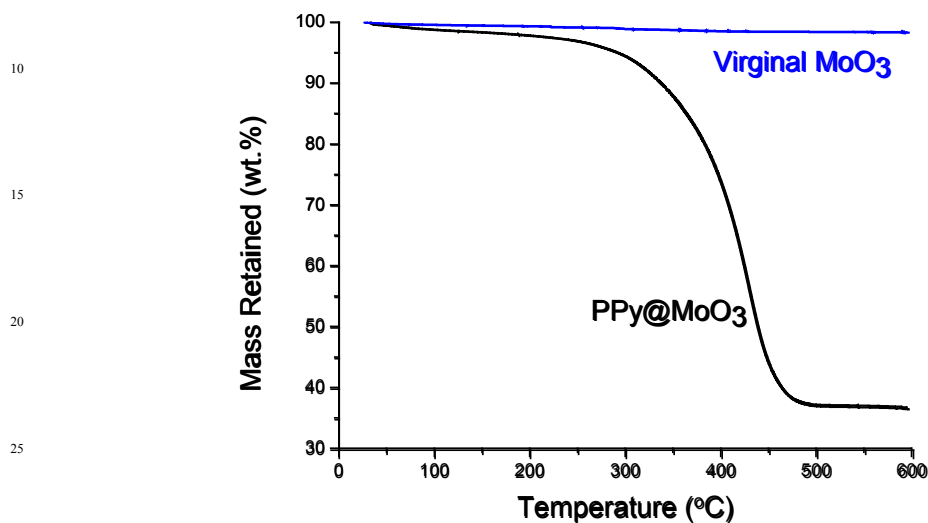

Fig.S1 Thermogravimetric analysis of the virginal MoO<sub>3</sub> nanobelts and the PPy@MoO<sub>3</sub> nanocomposite under air.

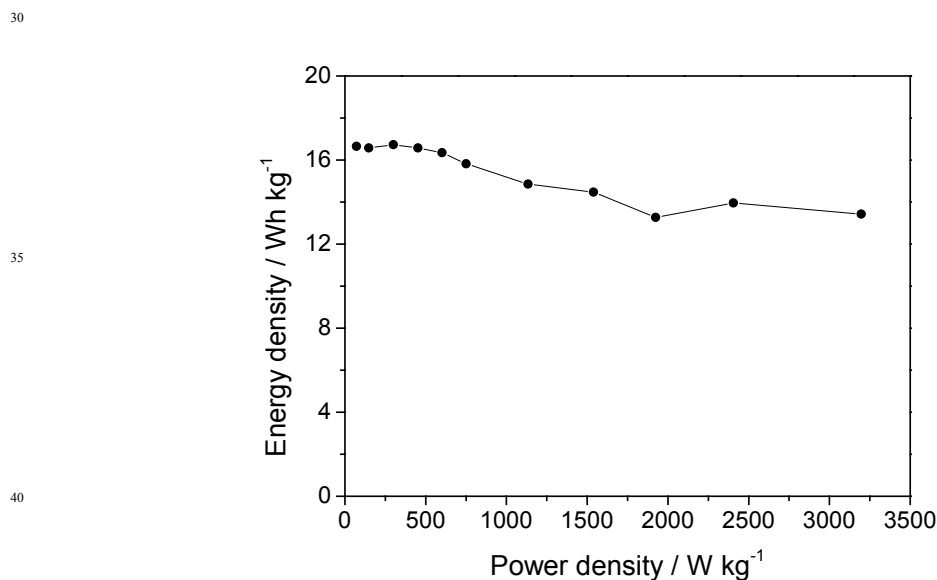

Fig. S2 Ragone plots of the virginal PPy//AC supercapacitor using 0.5 mol l<sup>-1</sup> K<sub>2</sub>SO<sub>4</sub> solution as the electrolyte.

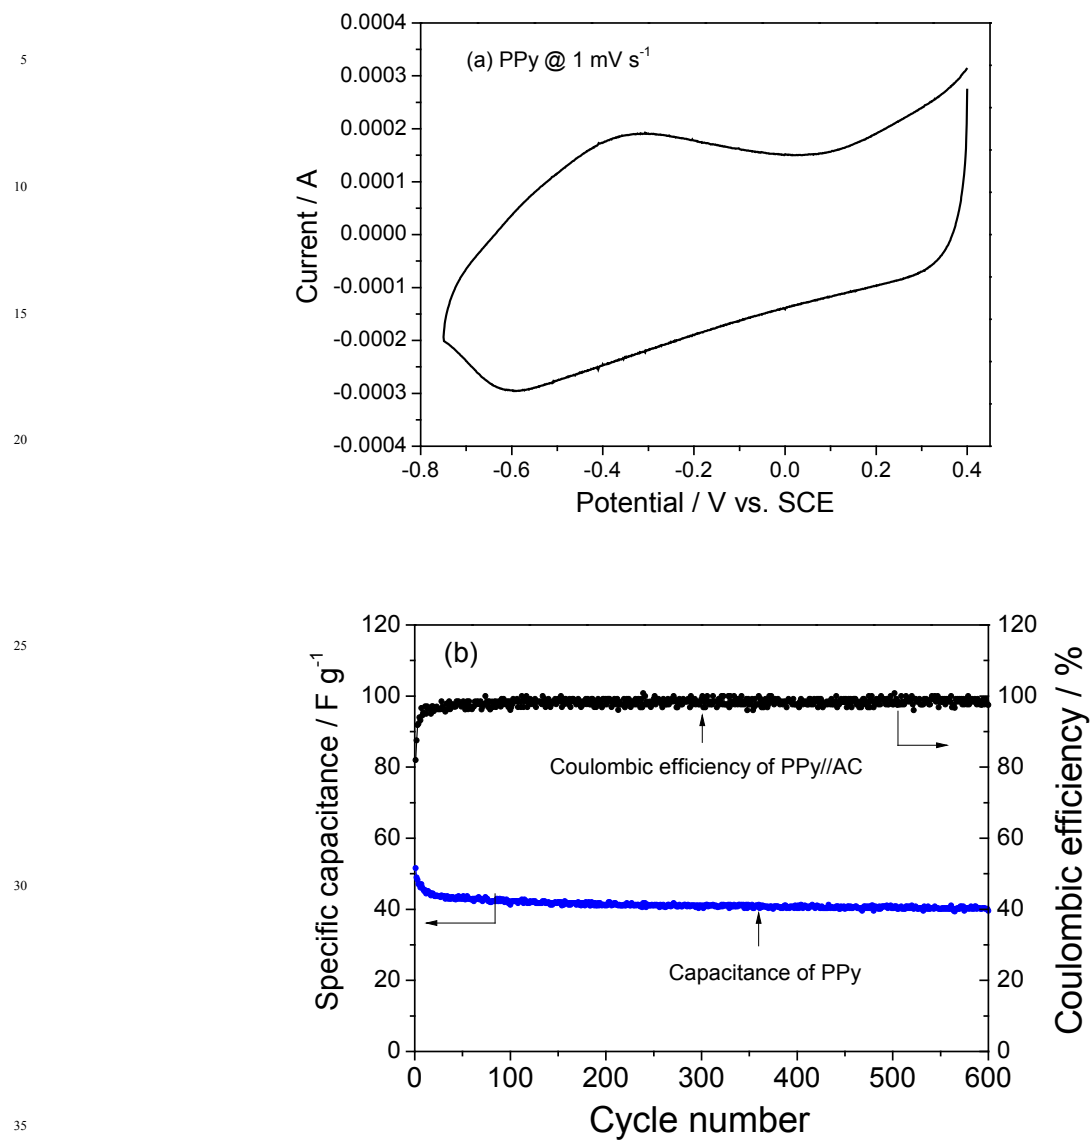

**Fig. S3** (a) CV curve at the scan rate 1 mV s<sup>-1</sup> and (b) the cycling behavior at 500 mA g<sup>-1</sup> for the virginal PPy in 0.5 mol l<sup>-1</sup> K<sub>2</sub>SO<sub>4</sub> aqueous electrolyte.
